# Supplementary material
Source: PubMed Central journal article supplement (PMC4359640)
Supplement: NIHMS661549-supplement-1.pdf [file NIHMS661549-supplement-1.pdf]

## Supplemental Figure S1 (Related to Figure 1):

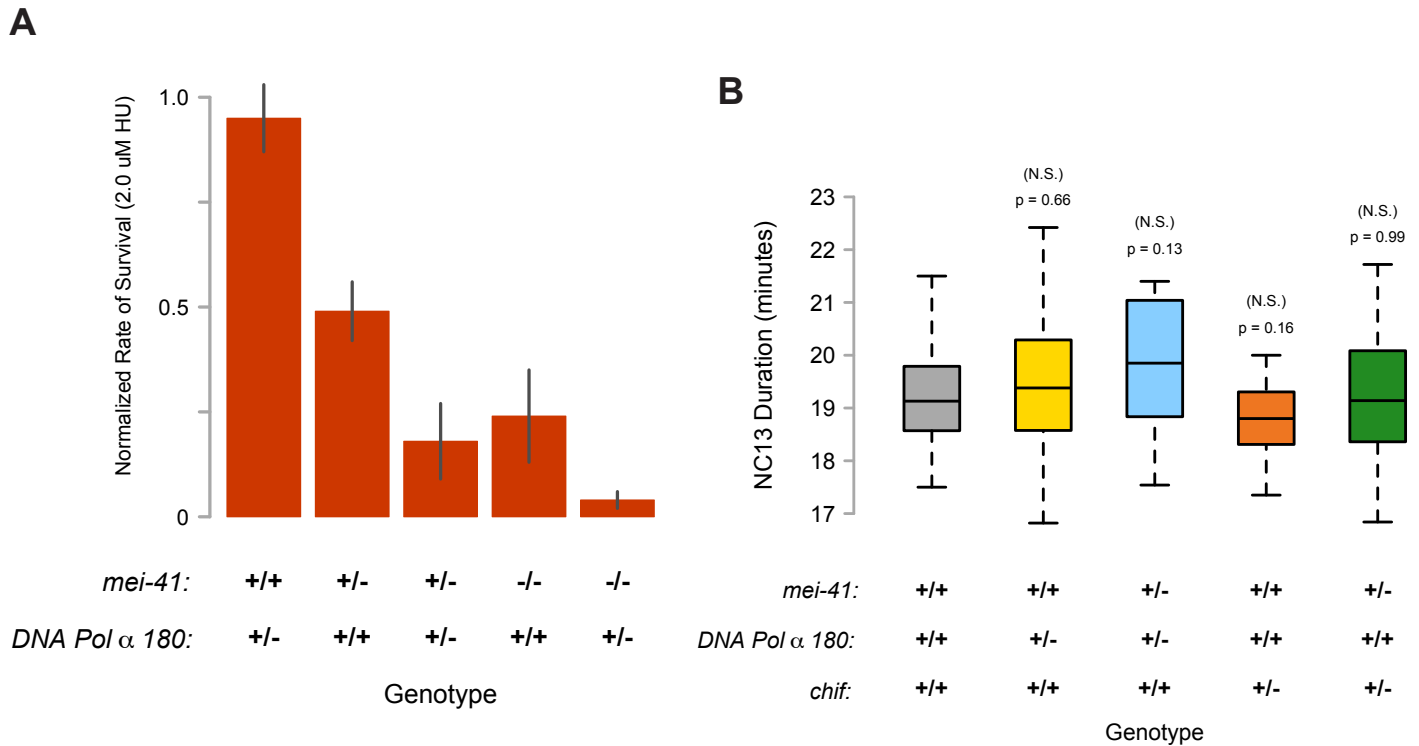

### Reduced maternal DNA Pol α 180 or Dbf4 does not affect NC13 duration.

**(A) DNAPol α 180 sensitizes mei-41 heterozygote and homozygote larvae to replication stress.** Larvae were fed standard medium supplemented with 2 μM HU and the rate of survival was scored after eclosion relative to a non-treated culture. Genotypes are indicated on the x-axis. Data are represented as mean survival rate ± SEM (N = 4).

**(B) Reduced dosage of maternal DNAPol α 180 or Dbf4 (*chif*) does not affect NC13 duration either alone or in combination with heterozygosity for mei-41.** NC13 was measured in wild type (N = 23), DNA Polα-180<sup>Emus304/+</sup> (N = 21), mei-41<sup>D3/+</sup>; DNA Polα-180<sup>Emus304/+</sup> (N = 18), *chif*<sup>4/+</sup> (N = 22) and mei-41<sup>D3/+</sup>; *chif*<sup>4/+</sup> (N = 18) embryos. Boxplots show the distribution of nuclear cycle 13 times for each genotype. The genotype is indicated below each box, and p-values for a two-tailed t-test comparing each genotype with wild-type is above. (N.S.) indicates not significantly different than the wild-type distribution of times.
